# Supplementary material
Source: Research Square preprint supplement (doi:10.21203/rs.3.rs-9160875/v1)
Supplement: Supplementary file 1 [file 3da71500fe2af11f416a9431.docx]

**Table S1.Sequence of primer used for Quantitative Real-Time PCR (qRT-PCR)**

| **Gene** | **Cycles** | **Tem.(˚C)** |  | **5’ to 3’ Sequences** |
| --- | --- | --- | --- | --- |
| **MAX** | **40** | **60** | **F** | **CTTCTGCTGATCCTGTCTGATG** |
| **R** | **TGCTGTGAAGGGAGATGTATTG** |
| **MTURN** | **40** | **60** | **F** | **GATTTGGAGCCCGTGAAGAA** |
| **R** | **GGACGGTTTGGGCATTTCTA** |
| **HLA‑B** | **40** | **60** | **F** | **GCACCCACACTGAAAGATGA** |
| **R** | **AGGAGTCATAGGAGTGGTAAGG** |
| ***CAV1*** | **40** | **60** | **F** | **GGTTGACACTAGCCCAATGA** |
|  |  |  | **R** | **GTTGATGAGAGGCAGGGAAA** |
| ***GAPDH*** | **40** | **56** | **F**  **R** | **GAAGGTGAAGGTCGGAGTC**  **GAAGATGGTGATGGGATTTC** |

**Table S2: Sequences of primers used in methylation-specific PCR (MSP)**

| **S.No** | **Gene** |  | **Sequences** | **Cycles** | **Tem.(˚C)** |
| --- | --- | --- | --- | --- | --- |
| **1** | ***MAX*** | **MF** | **GCGGAAGTTAGTTTAGATTTTAGTTC** | **40** | **56** |
|  |  | **UF** | **TACCTACAACAACAACAACAACG** |  |  |
|  |  | **UF** | **TGGAAGTTAGTTTAGATTTTAGTTTGT** | **40** | **56** |
|  |  | **UR** | **CCTACAACAACAACAACAACACC** |  |  |
| **2** | ***MTURN*** | **MF** | **GTAAAACGTCGGTTAAGACGTG** | **40** | **52** |
|  |  | **MR** | **GATCCATCTTAATTATCACGAAA** |  |  |
|  |  | **UF** | **GTAAAATGTTGGTTAAGATGTGG** | **40** | **52** |
|  |  | **UR** | **AAAACAATCCATCTTAATTATCACAAAA** |  |  |
| **3** | ***HLA-B*** | **MF** | **GTTAAGAAGGAGTAGTAGGACGGC** | **40** | **58** |
|  |  | **MR** | **CTAAACCCACACCATAAAAACG** |  |  |
|  |  | **UF** | **GTTAAGAAGGAGTAGTAGGATGGT** | **40** | **58** |
|  |  | **UR** | **CACACCATAAAAACATTCATAAACC** |  |  |
| **4** | ***CAV1*** | **MF** | **GGTTATGGTAGACGAGTTGAGC** | **40** | **50** |
|  |  | **MR** | **AATAAAACTAACCTTCCAAATACCGT** |  |  |
|  |  | **UF** | **TTATGGTAGATGAGTTGAGTGAGA** | **40** | **50** |
|  |  | **UR** | **AATAAAACTAACCTTCCAAATACCATC** |  |  |
| **5** | ***β-actin*** | **MF**  **MR**  **UF**  **UR** | **TATTATTGTCGAAAGAGAAATCGTT   CGATAATAATAACCTATCCGTCGAA**  **ATTATTGTTGAAAGAGAAATTG   CAATAATAATAACCTATCCATCAAAA** | **40**  **40** | **54**  **54** |

**Fig S1:** Representative agarose gel electrophoresis of methylated and unmethylated promoter-specific amplicons generated by methylation-specific PCR (MS-PCR).

(I) Tissue samples: Representative gel images for (a) MAX, (b) MTURN, (c) HLA-B, (d) CAV1, and (e) β-actin. Lane 1, universal control DNA; lanes 2–3, tumor-free tissue (TF); lanes 4–5, NSCLC tumor tissue (TT-NSCLC); lane 6, SCLC tumor tissue (TT-SCLC).

(II) Plasma samples: Representative gel images for (a) MAX, (b) MTURN, (c) HLA-B, (d) CAV1, and (e) β-actin. Lane 1, universal control DNA; lanes 2–3, healthy control cfDNA; lanes 4–5, NSCLC cfDNA; lane 6, SCLC cfDNA. β-actin was used as an internal control.

Footnotes / Abbreviations: **MAX: MYC associated transcriptional regulator X, MTURN : maturin, neural progenitor differentiation regulator homolog, HLA-B: major histocompatibility complex, class I, B , CAV1: caveolin 1**. U-unmethylated DNA, M-methylated DNA, L- DNA ladder; bp- base pairs, SCLC- small cell lung cancer; NSCLC- non-small cell lung cancer; TT-tumor tissue, TF-tumor-free tissue, cfDNA-cell-free DNA.Top of Form
